# Supplementary material for: A Correlation Study of DHA Intake Estimated by a FFQ and Concentrations in Plasma and Erythrocytes in Mid- and Late Pregnancy
Source: MDPI journal article supplement (doi:10.3390/nu9111256), 2017-11-16
Supplement: s1 [file s1]

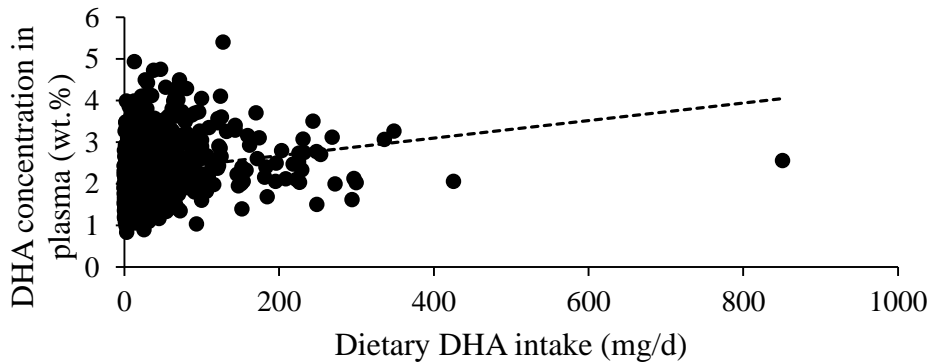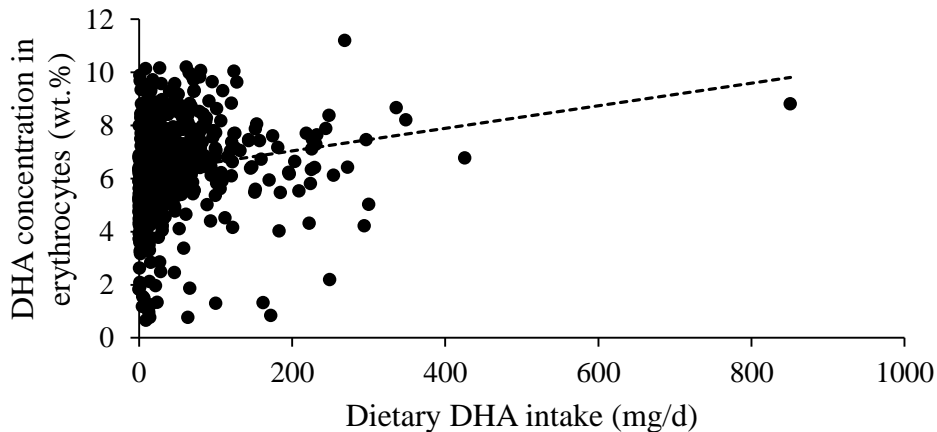

Figure S2. The scatter plots between dietary DHA intake and its concentrations in plasma and erythrocytes
