# Supplementary material for: A Correlation Study of DHA Intake Estimated by a FFQ and Concentrations in Plasma and Erythrocytes in Mid- and Late Pregnancy
Source: MDPI journal article supplement (doi:10.3390/nu9111256), 2017-11-16
Supplement: s1 [file s1]

Table S1. Adjusted Spearman correlation coefficients between dietary DHA intake and its concentrations in plasma and erythrocytes<sup>1</sup>

| Adjusted Confounders            | Overall | Pregnancy stages |                | Regions   |          |        |
|---------------------------------|---------|------------------|----------------|-----------|----------|--------|
|                                 |         | Mid-pregnancy    | Late pregnancy | Coastland | Lakeland | Inland |
| Plasma                          |         |                  |                |           |          |        |
| Maternal age                    | 0.31    | 0.27             | 0.45           | 0.17      | 0.16     | 0.21   |
| Pre-pregnancy body mass index   | 0.31    | 0.27             | 0.46           | 0.17      | 0.16     | 0.20   |
| Stages of pregnancy             | 0.37    | —                | —              | 0.32      | 0.17     | 0.18   |
| Parity                          | 0.31    | 0.27             | 0.44           | 0.17      | 0.16     | 0.20   |
| Education level                 | 0.31    | 0.27             | 0.45           | 0.15      | 0.16     | 0.18   |
| Ethnicity                       | 0.31    | 0.26             | 0.46           | 0.17      | 0.15     | 0.19   |
| Annual family income per capita | 0.31    | 0.27             | 0.45           | 0.17      | 0.16     | 0.20   |
| Erythrocytes                    |         |                  |                |           |          |        |
| Maternal age                    | 0.34    | 0.27             | 0.38           | 0.04      | 0.24     | 0.30   |
| Pre-pregnancy body mass index   | 0.34    | 0.28             | 0.39           | 0.04      | 0.24     | 0.29   |
| Stages of pregnancy             | 0.34    | —                | —              | 0.07      | 0.24     | 0.28   |
| Parity                          | 0.33    | 0.28             | 0.38           | 0.04      | 0.24     | 0.29   |
| Education level                 | 0.33    | 0.29             | 0.37           | 0.02      | 0.24     | 0.28   |
| Ethnicity                       | 0.33    | 0.29             | 0.38           | 0.04      | 0.23     | 0.29   |
| Annual family income per capita | 0.34    | 0.28             | 0.39           | 0.04      | 0.23     | 0.29   |

<sup>1</sup> Individually adjusted for maternal age, pre-pregnancy body mass index, stages of pregnancy, parity, education level, ethnicity, and annual family income per capita. All P values were <0.05, except that the P values for erythrocytes in coastland were >0.05.

**Table S2.** Spearman partial correlation coefficients (95% confidence intervals) between dietary DHA intake and its concentrations in plasma and erythrocytes among 780 pregnant women<sup>1</sup>

|                        | Plasma               |        | Erythrocytes         |        |
|------------------------|----------------------|--------|----------------------|--------|
|                        | Partial <sup>2</sup> | P      | Partial <sup>2</sup> | P      |
| <b>Overall</b>         | 0.35 (0.28, 0.41)    | <0.001 | 0.33 (0.26, 0.39)    | <0.001 |
| <b>Pregnancy stage</b> |                      |        |                      |        |
| Mid-pregnancy          | 0.26 (0.17, 0.35)    | <0.001 | 0.29 (0.20, 0.38)    | <0.001 |
| Late pregnancy         | 0.42 (0.33, 0.50)    | <0.001 | 0.35 (0.26, 0.44)    | <0.001 |
| <b>Regions</b>         |                      |        |                      |        |
| Coastland              | 0.32 (0.21, 0.43)    | <0.001 | 0.04 (-0.08, 0.16)   | 0.551  |
| Lakeland               | 0.12 (-0.01, 0.24)   | 0.063  | 0.21 (0.08, 0.32)    | 0.001  |
| Inland                 | 0.13 (0.01, 0.25)    | 0.035  | 0.24 (0.12, 0.35)    | <0.001 |

<sup>1</sup>Among the 804 pregnant women, 24 women who consumed DHA supplements were excluded.

<sup>2</sup>Adjusted for maternal age, pre-pregnancy body mass index, stage of pregnancy, parity, education level, ethnicity, and annual family income per capita.

**Table S3.** Characteristics of the 780 pregnant women in mid- and late pregnancy.

| Characteristics                           | Overall<br>(N=780) |      | Mid-pregnancy<br>(N=396) |      | Late pregnancy<br>(N=384) |      | P value <sup>2</sup> |
|-------------------------------------------|--------------------|------|--------------------------|------|---------------------------|------|----------------------|
|                                           | n                  | %    | n                        | %    | n                         | %    |                      |
| Age (Year)                                |                    |      |                          |      |                           |      | 0.034                |
| ≤25                                       | 136                | 17.4 | 74                       | 18.7 | 62                        | 16.1 |                      |
| >25 to 30                                 | 477                | 61.2 | 252                      | 63.6 | 225                       | 58.6 |                      |
| >30                                       | 167                | 21.4 | 70                       | 17.7 | 97                        | 25.3 |                      |
| Pre-pregnancy BMI<br>(Kg/m <sup>2</sup> ) |                    |      |                          |      |                           |      | 0.193                |
| <18.5                                     | 140                | 18.0 | 70                       | 17.7 | 70                        | 18.2 |                      |
| 18.5 to <25                               | 575                | 73.7 | 286                      | 72.2 | 289                       | 75.3 |                      |
| ≥25                                       | 66                 | 8.3  | 40                       | 10.1 | 25                        | 6.5  |                      |

|                                           |     |      |     |      |     |      |       |
|-------------------------------------------|-----|------|-----|------|-----|------|-------|
| Area of residence                         |     |      |     |      |     |      | 0.865 |
| Coastland                                 | 257 | 32.9 | 134 | 33.8 | 123 | 32.0 |       |
| Lakeland                                  | 255 | 32.7 | 128 | 32.3 | 127 | 33.1 |       |
| Inland                                    | 268 | 34.4 | 134 | 33.8 | 134 | 34.9 |       |
| Parity                                    |     |      |     |      |     |      | 0.341 |
| Nulliparous                               | 644 | 82.6 | 332 | 83.8 | 312 | 81.3 |       |
| Multiparous                               | 136 | 17.4 | 64  | 16.2 | 72  | 18.8 |       |
| Ethnicity                                 |     |      |     |      |     |      | 0.007 |
| Han                                       | 741 | 95.0 | 368 | 92.9 | 373 | 97.1 |       |
| Others                                    | 39  | 5.0  | 28  | 7.1  | 11  | 2.9  |       |
| Education                                 |     |      |     |      |     |      | 0.990 |
| College or above                          | 505 | 64.7 | 257 | 64.9 | 248 | 64.6 |       |
| High school                               | 171 | 21.9 | 86  | 21.7 | 85  | 22.1 |       |
| Middle school or less                     | 104 | 13.3 | 53  | 13.4 | 51  | 13.3 |       |
| Annual family income<br>per capita (Yuan) |     |      |     |      |     |      | 0.024 |
| <30 000                                   | 286 | 36.7 | 146 | 36.9 | 140 | 36.5 |       |
| 30 000 to <50 000                         | 227 | 29.1 | 124 | 31.3 | 103 | 26.8 |       |
| 50 000 to <100 000                        | 183 | 23.5 | 81  | 20.5 | 102 | 26.6 |       |
| ≥100 000                                  | 29  | 3.7  | 10  | 2.5  | 19  | 5.0  |       |
| Missing                                   | 55  | 7.0  | 35  | 8.8  | 20  | 5.2  |       |

<sup>1</sup> Among the 804 pregnant women, 24 women who consumed DHA supplements were excluded.

<sup>2</sup> Chi-square test was used to compare percentages by stage of pregnancy.

**Table S4.** Dietary DHA intake and its concentrations in plasma and erythrocytes among 780 women by pregnancy stages and regions<sup>1</sup>

|                              | Overall      | Pregnancy stages |                |         | Regions      |              |             |                      |
|------------------------------|--------------|------------------|----------------|---------|--------------|--------------|-------------|----------------------|
|                              |              | Mid-pregnancy    | Late pregnancy | P value | Coastland    | Lakeland     | Inland      | P value <sup>2</sup> |
| <b>Dietary intake (mg/d)</b> |              |                  |                |         |              |              |             |                      |
| Median                       | 18.5         | 18.0             | 19.5           | 0.705   | 28.6         | 21.4         | 8.7         | <0.001               |
| IQR                          | 7.5 to 42.2  | 7.5 to 40.1      | 7.9 to 47.7    |         | 15.1 to 63.3 | 10.3 to 42.4 | 2.6 to 20.5 |                      |
| Adjusted median <sup>3</sup> | 19.6         | 19.6             | 20.4           |         | 29.4         | 20.5         | 8.8         |                      |
| Adjusted IQR <sup>3</sup>    | 7.9 to 43.8  | 7.9 to 43.8      | 8.7 to 43.9    |         | 14.4 to 57.9 | 10.6 to 40.5 | 2.7 to 19.6 |                      |
| Minimum, maximum             | 0.0 to 348.8 | 0.0 to 348.8     | 0.0 to 296.8   |         | 0.2 to 296.8 | 0.0 to 348.8 | 0.0 to 300  |                      |
| Mean                         | 33.0         | 31.6             | 34.4           |         | 46.4         | 32.7         | 20.3        |                      |
| SD                           | 42.2         | 40.7             | 43.7           |         | 47.2         | 36.8         | 37.9        |                      |
| <b>Plasma (wt.%)</b>         |              |                  |                |         |              |              |             |                      |
| Median                       | 2.2          | 2.6              | 2.0            | <0.001  | 2.8          | 2.2          | 1.9         | <0.001               |
| IQR                          | 1.9 to 2.7   | 2.2 to 3.0       | 1.6 to 2.3     |         | 2.4 to 3.3   | 1.9 to 2.5   | 1.6 to 2.2  |                      |
| Adjusted median <sup>3</sup> | 2.2          | 2.6              | 2.0            |         | 2.8          | 2.2          | 2.0         |                      |
| Adjusted IQR <sup>3</sup>    | 1.9 to 2.6   | 2.2 to 3.1       | 1.6 to 2.3     |         | 2.4 to 3.3   | 1.9 to 2.5   | 1.6 to 2.2  |                      |
| Minimum, maximum             | 0.8 to 5.4   | 1.1 to 5.4       | 0.8 to 4.3     |         | 1.4 to 5.4   | 0.9 to 3.5   | 0.8 to 3.6  |                      |
| Mean                         | 2.3          | 2.6              | 2.0            |         | 2.9          | 2.2          | 1.9         |                      |
| SD                           | 0.7          | 0.7              | 0.6            |         | 0.7          | 0.5          | 0.5         |                      |
| <b>Erythrocyte (wt.%)</b>    |              |                  |                |         |              |              |             |                      |
| Median                       | 6.3          | 6.5              | 6.0            | <0.001  | 7.5          | 6.3          | 5.5         | <0.001               |
| IQR                          | 5.5 to 7.3   | 5.7 to 7.5       | 5.3 to 7.1     |         | 6.7 to 8.5   | 5.7 to 6.9   | 5.0 to 6.1  |                      |
| Adjusted median <sup>3</sup> | 6.4          | 6.5              | 6.2            |         | 7.5          | 6.3          | 5.5         |                      |
| Adjusted IQR <sup>3</sup>    | 5.5 to 7.4   | 5.9 to 7.5       | 5.4 to 7.3     |         | 6.9 to 8.3   | 5.7 to 6.8   | 5.0 to 6.1  |                      |
| Minimum, maximum             | 0.7 to 10.2  | 0.8 to 10.2      | 0.7 to 10.1    |         | 0.7 to 10.2  | 2.1 to 8.4   | 1.0 to 8.4  |                      |
| Mean                         | 6.3          | 6.6              | 6.1            |         | 7.3          | 6.2          | 5.4         |                      |
| SD                           | 1.5          | 1.4              | 1.7            |         | 1.7          | 0.9          | 1.2         |                      |

<sup>1</sup>Among the 804 pregnant women, 24 women who consumed DHA supplements were excluded.

<sup>2</sup>Significantly different across regions: Coastland > Lakeland > Inland (Kruskal-Wallis tests followed by Bonferroni corrected Mann-Whitney tests for multiple comparisons were used).

<sup>3</sup> Estimated from quantile regression models adjusted for maternal age, pre-pregnancy body mass index, stage of pregnancy, parity, education level, ethnicity, and annual family income per capita.

IQR, interquartile range; SD, standard deviation; wt.%, weight percent of total fatty acids.
