# Supplementary material for: A Correlation Study of DHA Intake Estimated by a FFQ and Concentrations in Plasma and Erythrocytes in Mid- and Late Pregnancy
Source: Nutrients. 2017 Nov 16;9(11):1256. doi: 10.3390/nu9111256 (PMC5707728; doi:10.3390/nu9111256)
Supplement: Supplementary file 1 [file nutrients-09-01256-s001.zip]

Archive with 4 entries (4 files):
- Supplemental files-Figure S1.pdf
- Supplemental files-Figure S2.pdf
- Supplemental files-Figure S3.pdf
- Supplemental files-Tables.pdf
