# Supplementary figures and images for: A Correlation Study of DHA Intake Estimated by a FFQ and Concentrations in Plasma and Erythrocytes in Mid- and Late Pregnancy
Source: MDPI journal article supplement (doi:10.3390/nu9111256), 2017-11-16

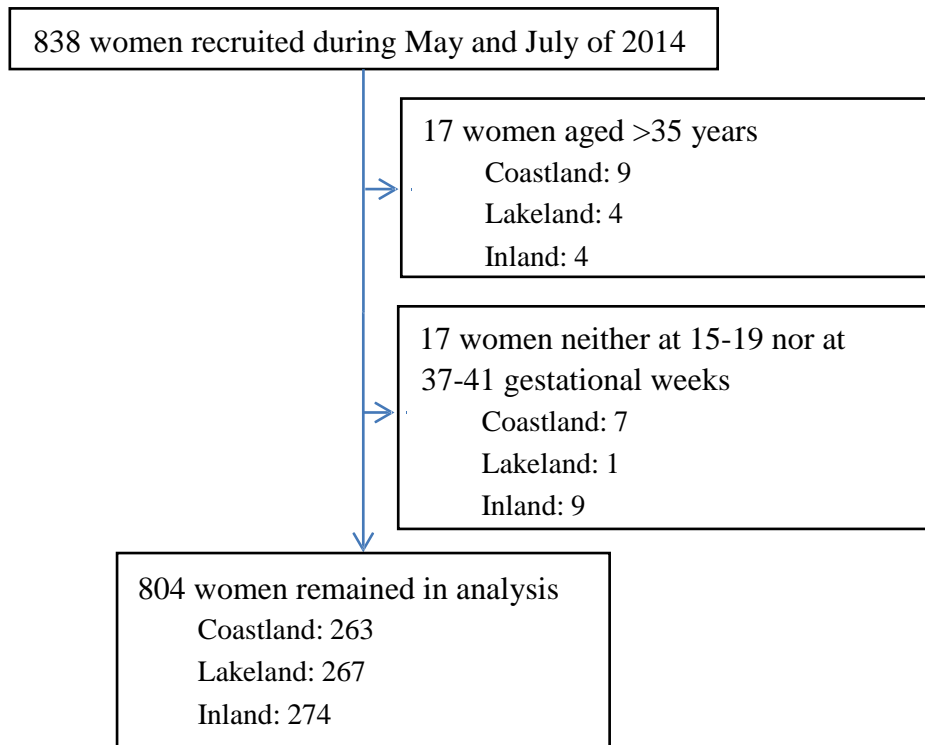

**Figure S1.** Participant flowchart

Supplement: s1 [file s1]
